# Supplementary material
Source: publisher site journal article supplement (https://www.dovepress.com/article/441583)
Supplement: Supplementary file 1 [file get_supplementary_file.php]

# Supplementary Material

Box S-1. Proposed *A Priori* Hypotheses

| ***A Priori* Hypotheses** |  |
| --- | --- |
| *Hypothesis 1:* Moderate to strong positive correlations of the FCS-SIS items measuring Abdominal Pain and Diarrhea (24-hour recall and 7-day recall) with the GSRS subscale scores of Abdominal Pain and Diarrhea, respectively. Smaller correlations were expected between the FCS-SIS Abdominal Pain and Diarrhea item scores and the GSRS Constipation, Indigestion, and Reflux subscale scores as well as the PROMIS-29 score. The 24-hour recall items were expected to have smaller correlations than the 7-day recall items because their recall period differs from that of the GSRS and PROMIS items. | |
| *Hypothesis 2:* Moderate to strong negative correlations between the FCS-SIS item measuring Difficulty Thinking (24-hour recall and 7-day recall) and the PROMIS Cognitive Function score. Smaller correlations were expected between the FCS-SIS Difficulty Thinking item score and other PROMIS and GSRS scores than with the PROMIS Cognitive Function score. The 24-hour recall item was expected to have smaller correlations than the 7-day recall item because its recall period differs from that of the PROMIS Cognitive Function short form. | |
| *Hypothesis 3:* Moderate to strong positive correlations between the FCS-SIS item measuring Physical Fatigue (24-hour recall and 7-day recall) and the PROMIS-29 Fatigue score. Smaller correlations were expected between the FCS-SIS Physical Fatigue item score and other PROMIS and GSRS scores than with the PROMIS-29 Fatigue score. The 24-hour recall item was expected to have smaller correlations than the 7-day recall item because its recall period differs from that of the PROMIS-29 Fatigue items. | |
| *Hypothesis 4:* Moderate to strong positive correlations between the FCS-SIS Symptom composite score (24-hour recall and 7‑day recall) and the PGIS score. The 24-hour recall composite score was expected to have smaller correlations than the 7-day recall composite score because the recall period of its items differs from that of the PGIS item. | |
| *Hypothesis 5:* Moderate to strong negative correlations between the FCS-SIS Impact composite score and the PROMIS Global Health scores. | |

Table S-1. Familial Chylomicronemia Syndrome Symptoms and Impacts Scale Item-Level Frequencies

| FCS Symptom items (24-hour recall; 0-to-10 NRS) | n | 0 None | 1 | 2 | 3 | 4 | 5 | 6 | 7 | 8 | 9 | 10 Worst | Missing |
| --- | --- | --- | --- | --- | --- | --- | --- | --- | --- | --- | --- | --- | --- |
| Abdominal Pain | 33 | 18 (54.5) | 1 (3.0) | 3 (9.1) | 1 (3.0) | 4 (12.1) | 3 (9.1) | 2 (6.1) | 0 (0.0) | 1 (3.0) | 0 (0.0) | 0 (0.0) | 0 (0.0) |
| Physical Fatigue | 33 | 6 (18.2) | 0 (0.0) | 8 (24.2) | 4 (12.1) | 1 (3.0) | 3 (9.1) | 1 (3.0) | 6 (18.2) | 2 (6.1) | 2 (6.1) | 0 (0.0) | 0 (0.0) |
| Difficulty Thinking | 33 | 11 (33.3) | 3 (9.1) | 4 (12.1) | 3 (9.1) | 1 (3.0) | 4 (12.1) | 4 (12.1) | 1 (3.0) | 1 (3.0) | 0 (0.0) | 1 (3.0) | 0 (0.0) |
| Diarrhea | 33 | 19 (57.6) | 1 (3.0) | 1 (3.0) | 2 (6.1) | 3 (9.1) | 1 (3.0) | 3 (9.1) | 0 (0.0) | 2 (6.1) | 1 (3.0) | 0 (0.0) | 0 (0.0) |
| FCS Impact Items (7-day recall, 5‑point VRS) |  | 0 | 1 | 2 | 3 | 4 |  |  |  |  |  |  |  |
| Worry About Pancreatitis Attack | 33 | 4 (12.1) | 5 (15.2) | 7 (21.2) | 5 (15.2) | 12 (36.4) |  |  |  |  |  |  | 0 (0.0) |
| Avoid Making Plans | 33 | 8 (24.2) | 6 (18.2) | 10 (30.3) | 6 (18.2) | 3 (9.1) |  |  |  |  |  |  | 0 (0.0) |
| Feel Anxious in Social Situations Involving Food | 33 | 8 (24.2) | 4 (12.1) | 3 (9.1) | 6 (18.2) | 12 (36.4) |  |  |  |  |  |  | 0 (0.0) |
| Avoid Social Situations Involving Food | 33 | 9 (27.3) | 4 (12.1) | 8 (24.2) | 10 (30.3) | 2 (6.1) |  |  |  |  |  |  | 0 (0.0) |
| Worry About Eating Food Prepared by Someone Else | 33 | 7 (21.2) | 5 (15.2) | 7 (21.2) | 3 (9.1) | 11 (33.3) |  |  |  |  |  |  | 0 (0.0) |
| Worry About Going Over Dietary Fat Limit | 33 | 1 (3.0) | 8 (24.2) | 6 (18.2) | 6 (18.2) | 12 (36.4) |  |  |  |  |  |  | 0 (0.0) |
| Worry About Future Health | 33 | 0 (0.0) | 1 (3.0) | 12 (36.4) | 7 (21.2) | 13 (39.4) |  |  |  |  |  |  | 0 (0.0) |
| Worry About Being a Burden | 33 | 5 (15.2) | 3 (9.1) | 9 (27.3) | 2 (6.1) | 14 (42.4) |  |  |  |  |  |  | 0 (0.0) |
| Less Physically Attractive | 33 | 8 (24.2) | 5 (15.2) | 9 (27.3) | 7 (21.2) | 4 (12.1) |  |  |  |  |  |  | 0 (0.0) |
| Feel Sad or Depressed | 33 | 7 (21.2) | 7 (21.2) | 14 (42.4) | 1 (3.0) | 4 (12.1) |  |  |  |  |  |  | 0 (0.0) |
| Feel Judged by Others | 33 | 9 (27.3) | 8 (24.2) | 7 (21.2) | 5 (15.2) | 4 (12.1) |  |  |  |  |  |  | 0 (0.0) |
| Worry About Finances | 33 | 12 (36.4) | 7 (21.2) | 2 (6.1) | 7 (21.2) | 5 (15.2) |  |  |  |  |  |  | 0 (0.0) |
| Less Productive | 32 | 5 (15.6) | 10 (31.3) | 7 (21.9) | 8 (25.0) | 2 (6.3) |  |  |  |  |  |  | 1 (3.0) |

FCS = familial chylomicronemia syndrome; NRS = numeric rating scale; VRS = verbal response scale.

Note: FCS Impact items are answered using the following categories: 0 = ’Never,’ 1 = ’Rarely,’ 2 = ’Sometimes, 3 = ’Often,’ 4 = ’Always.’

Table S-2. Familial Chylomicronemia Syndrome Symptoms and Impacts Scale Item-Level Frequencies (7-Day Recall)

| FCS Symptom items (7-day recall; 0-to-10 NRS) | | n | n (%) | | | | | | | | | | | |
| --- | --- | --- | --- | --- | --- | --- | --- | --- | --- | --- | --- | --- | --- | --- |
| 0 None | 1 | 2 | 3 | 4 | 5 | 6 | 7 | 8 | 9 | 10 Worst | Missing |
| Abdominal Pain | 33 | | 16 (48.5) | 0 (0.0) | 1 (3.0) | 2 (6.1) | 2 (6.1) | 5 (15.2) | 0 (0.0) | 3 (9.1) | 2 (6.1) | 1 (3.0) | 1 (3.0) | 0 (0.0) |
| Physical Fatigue | 33 | | 5 (15.2) | 1 (3.0) | 4 (12.1) | 3 (9.1) | 2 (6.1) | 4 (12.1) | 2 (6.1) | 4 (12.1) | 4 (12.1) | 4 (12.1) | 0 (0.0) | 0 (0.0) |
| Difficulty Thinking | 33 | | 7 (21.2) | 4 (12.1) | 6 (18.2) | 2 (6.1) | 1 (3.0) | 1 (3.0) | 4 (12.1) | 3 (9.1) | 4 (12.1) | 1 (3.0) | 0 (0.0) | 0 (0.0) |
| Diarrhea | 33 | | 13 (39.4) | 5 (15.2) | 2 (6.1) | 1 (3.0) | 4 (12.1) | 2 (6.1) | 3 (9.1) | 1 (3.0) | 0 (0.0) | 1 (3.0) | 1 (3.0) | 0 (0.0) |

FCS = familial chylomicronemia syndrome; NRS = numeric rating scale.
